# Supplementary material for: Soil moisture heterogeneity regulates water use in Populus nigra L. by altering root and xylem sap phytohormone concentrations
Source: Oxford University Press journal article supplement (doi:10.1093/treephys/tpaa037), 2020-03-16
Supplement: figure_s1_tpaa037.docx [file figure_s1_tpaa037.docx]

**Figure S1.** Soil moisture release curve for the soil used in the experiment showing the relationship between soil gravimetric water content (θg) and water potential Ψsoil. The exponential decay function fitted is shown, together with the R2 value of the non-linear regression.
